# Supplementary material
Source: ML conference proceedings conference paper supplement (https://openaccess.thecvf.com/content/CVPR2022/html/Ma_Reconstructing_Surfaces_for_CVPR_2022_paper.html)
Supplement: Supplementary file 1 [file Ma_Reconstructing_Surfaces_for_CVPR_2022_supplemental.zip]

Archive with 2 entries (2 files):
- CVPR_OnSurfacePrior - Supp.pdf
- CVPR_OnSurfacePrior.mp4
