# Supplementary material
Source: ML conference proceedings conference paper supplement (https://openaccess.thecvf.com/content/CVPR2022/html/Ma_Reconstructing_Surfaces_for_CVPR_2022_paper.html)
Supplement: Supplementary file 1 [file Ma_Reconstructing_Surfaces_for_CVPR_2022_supplemental.zip › CVPR_OnSurfacePrior - Supp.pdf]

# Supplemental Material “Reconstructing Surfaces for Sparse Point Clouds with On-Surface Priors”

Baorui Ma, Yu-Shen Liu\*

School of Software, BNRist, Tsinghua University  
Beijing, China

mbr18@mails.tsinghua.edu.cn, liuyushen@tsinghua.edu.cn

Zhizhong Han

Wayne State University  
Detroit, USA

h312h@wayne.edu

## 1. Network

We learn both of SDFs and On-surface Decision Functions (ODF) using the same network released by NeuralPull [3]. During testing, we learn SDFs  $f_\theta$  from a sparse point cloud. In addition, we use the method introduced in NeuralPull [3] to sample queries around each point on the sparse point cloud.

## 2. Surface Reconstruction

We present more visual comparison in surface reconstruction in Fig. 1. With 100 points/ $m^2$  as input, our method can reconstruct surfaces with more geometry details than the state-of-the-art methods.

We also demonstrate our advantage in surface reconstructions from a large scale real scanning in our video.

## 3. Effect of Point Density

We highlight our advantages by visually comparing surface reconstructions from point clouds with different point densities. Current state-of-the-art methods, such as COcc [5], IMLS [2], LIG [1], may reconstruct smooth surfaces with high point densities, such as 4000 and 3000 points. However, their performance significantly degenerates when there are much fewer points. With on-surface prior, our method can reconstruct surfaces in high accuracy from sparse point clouds.

## 4. More Analysis

**Comparison with NeuralPull Variations.** We report numerical comparisons with NeuralPull (NP) [3] in our paper. Here, we report more numerical comparison with NP variations under the same dataset we used in ablation studies. One strategy to make NP work with sparse point clouds is

\*The corresponding author is Yu-Shen Liu. This work was supported by National Key R&D Program of China (2018YFB0505400, 2020YF-F0304100), the National Natural Science Foundation of China (62072268), and in part by Tsinghua-Kuaishou Institute of Future Media Data.

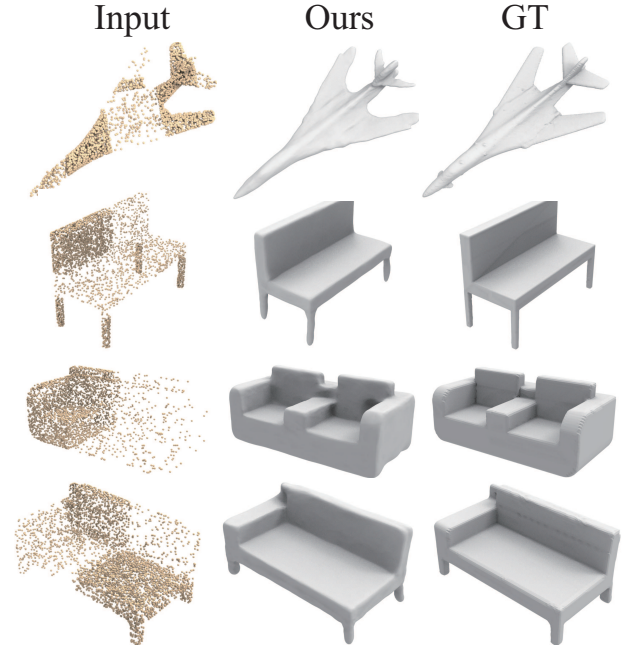

Figure 3. Visualization of reconstruction from extremely irregular point clouds.

to pull each query to its  $K$  nearest neighbors on the sparse point cloud, and  $K > 1$ , rather than the nearest one. We can pull a query to the plane formed by 3 nearest neighbors, or the center of the 3 nearest neighbors, or the center of the 5 nearest neighbors. As shown in Tab. 1, our method also significantly outperforms these variations.

**Eiknal Loss.** We did not observe improvements by the Eiknal Loss [4] which constrains the normal of gradients to be one, as shown by “Eiknal” in Tab. 1.

**Irregular Points.** All sparse points that we used are irregular and randomly sampled. We also evaluate our performance under extreme irregular cases that were manually generated in Fig. 3. We can see that our method can still handle extremely irregular points well.

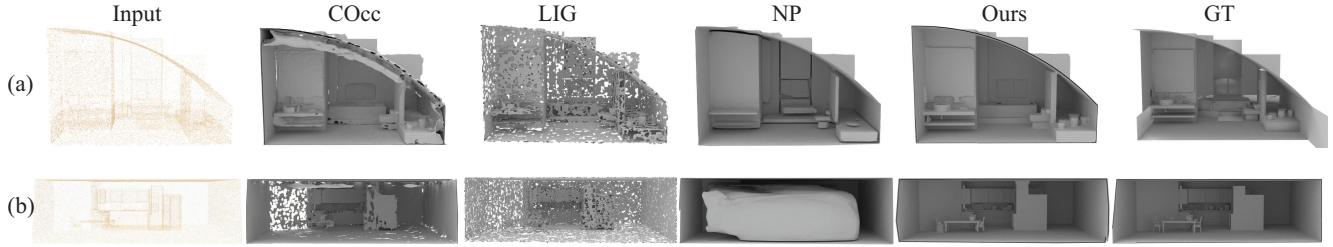

Figure 1. Visual comparison with COcc [5], LIG [1], NP [3] under SceneNet.

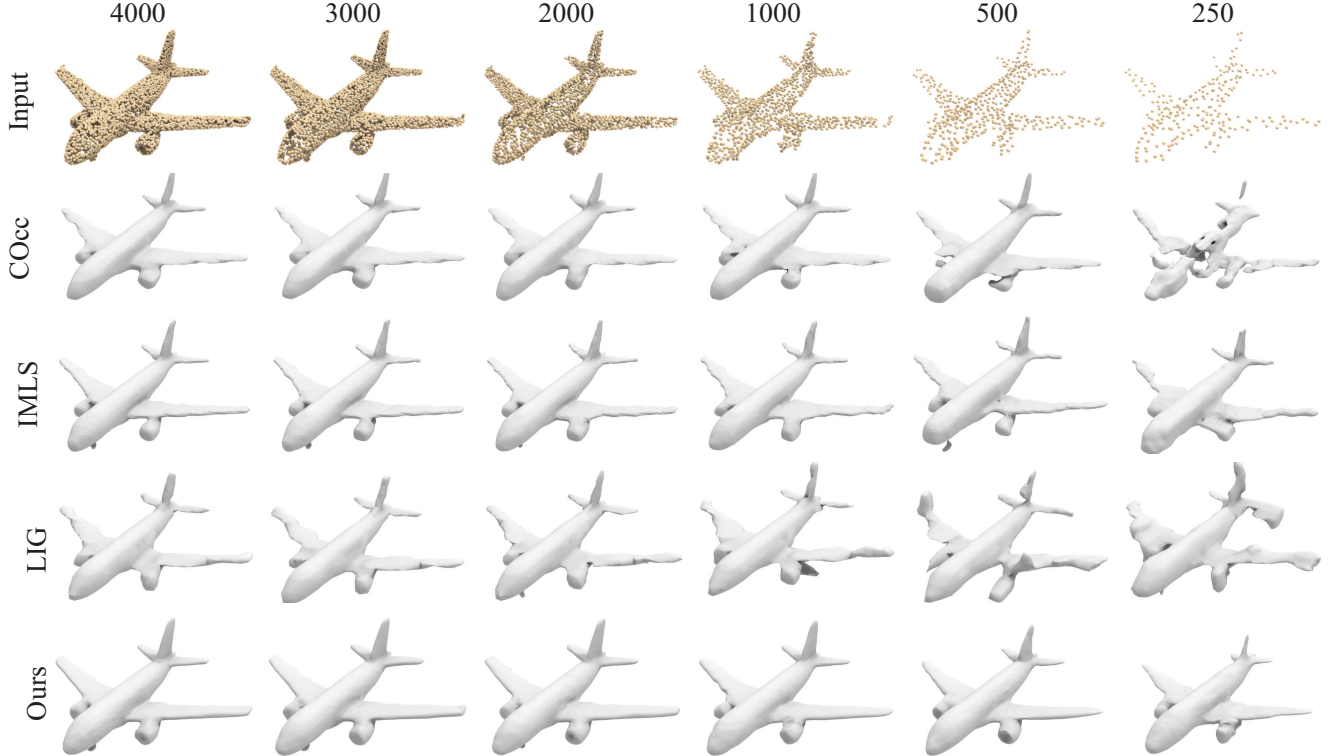

Figure 2. Effect of Point Density on performance of the state-of-the-art methods.

## 5. Implementation

Code and data are available at <https://github.com/mabaorui/OnSurfacePrior>.

## References

- [1] Chiyu Jiang, Avneesh Sud, Ameesh Makadia, Jingwei Huang, Matthias Nießner, and Thomas Funkhouser. Local implicit grid representations for 3D scenes. In *IEEE Conference on Computer Vision and Pattern Recognition*, 2020. 1, 2
- [2] Shi-Lin Liu, Hao-Xiang Guo, Hao Pan, Pengshuai Wang, Xin Tong, and Yang Liu. Deep implicit moving least-squares functions for 3D reconstruction. In *IEEE Conference on Computer Vision and Pattern Recognition*, 2021. 1
- [3] Baorui Ma, Zhizhong Han, Yu-Shen Liu, and Matthias Zwicker. Neural-pull: Learning signed distance functions from point clouds by learning to pull space onto surfaces. In *International Conference on Machine Learning*, 2021. 1, 2
- [4] Vincent Sitzmann, Julien N.P. Martel, Alexander W. Bergman, David B. Lindell, and Gordon Wetzstein. Implicit neural representations with periodic activation functions. In *Advances in Neural Information Processing Systems*, 2020. 1
- [5] Lars Mescheder, Marc Pollefeys, Andreas Geiger, Songyou Peng, Michael Niemeyer. Convolutional occupancy networks. In *European Conference on Computer Vision*, 2020. 1, 2

| $\lambda$ | 0     | Ours(0.4)    | NP    | NP 3NN plane | NP 3NN center | NP 5NN center | Eiknal |
|-----------|-------|--------------|-------|--------------|---------------|---------------|--------|
| L1CD      | 0.050 | <b>0.015</b> | 0.055 | 0.058        | 0.052         | 0.060         | 0.017  |
| NC        | 0.569 | <b>0.928</b> | 0.554 | 0.548        | 0.588         | 0.574         | 0.901  |

Table 1. More analysis.
